# Supplementary material
Source: PubMed Central journal article supplement (PMC8384472)
Supplement: NIHMS1720172-supplement-8.pdf [file NIHMS1720172-supplement-8.pdf]

**TableS1:** The fold change, between E13.5 *E8.5-Derm<sup>Ezh2</sup>* and controls, in the expression of target genes of various signaling pathways known to regulate epidermal and dermal differentiation

| Expression of various genes in E13.5 whole skin |              |                                                                        |             |                               |                    |               |
|-------------------------------------------------|--------------|------------------------------------------------------------------------|-------------|-------------------------------|--------------------|---------------|
| Function                                        | Gene Name    | Fold Change in E8.5-Derm <sup>Ezh2</sup><br>(with respect to controls) | p-value     | No. of embryos<br>/ condition | Significance       | probe_ID      |
| Wnt<br>signaling<br>targets                     | Wnt5a        | 0.60                                                                   | 0.38        | 3                             | Not Significant    | Mm00437347_m1 |
|                                                 | cMyc         | 0.76                                                                   | 0.52        | 3                             | Not Significant    | Mm00487804_m1 |
|                                                 | Lrig1        | 0.81                                                                   | 0.13        | 3                             | Not Significant    | Mm00456116_m1 |
|                                                 | Axin2        | 1.14                                                                   | <b>0.01</b> | 3                             | <b>Significant</b> | Mm00443610_m1 |
|                                                 | Lef1         | 1.49                                                                   | <b>0.02</b> | 3                             | <b>Significant</b> | Mm00550265_m1 |
| RA<br>signaling<br>targets                      | Hbegf        | 0.49                                                                   | 0.15        | 3                             | Not Significant    | Mm00439306_m1 |
|                                                 | RAR $\gamma$ | 0.92                                                                   | 0.58        | 6                             | Not Significant    | Mm00441091_m1 |
|                                                 | ROR2         | 0.77                                                                   | 0.16        | 6                             | Not Significant    | Mm00443470_m1 |
|                                                 | Aldh1a2      | 1.18                                                                   | 0.60        | 6                             | Not Significant    | Mm00501306_m1 |
|                                                 | Cyp26b1      | 1.53                                                                   | 0.24        | 6                             | Not Significant    | Mm00558507_m1 |
|                                                 | Stra6        | 0.67                                                                   | <b>0.03</b> | 6                             | <b>Significant</b> | Mm00486457_m1 |
|                                                 | Crabp2       | 0.68                                                                   | <b>0.04</b> | 6                             | <b>Significant</b> | Mm00801693_g1 |
| p63<br>targets                                  | Klf4         | 0.57                                                                   | 0.42        | 3                             | Not Significant    | Mm00516104_m1 |
|                                                 | K14          | 1.12                                                                   | 0.33        | 3                             | Not Significant    | Mm00516876_m1 |
| HH<br>signaling<br>targets                      | Snai1        | 0.95                                                                   | 0.91        | 3                             | Not Significant    | Mm00441533_g1 |
|                                                 | Pthrp        | 1.09                                                                   | 0.90        | 3                             | Not Significant    | Mm00436057_m1 |
|                                                 | Gli1         | 1.27                                                                   | 0.68        | 3                             | Not Significant    | Mm00494654_m1 |

**TableS2:** The fold change, between *E8.5-Derm<sup>Ezh2</sup>* and controls, in the expression of retinoic acid signaling target genes in E10.5 flow sorted cells

| Gene Name    | Fold Change in E8.5-Derm <sup>Ezh2</sup><br>(with respect to controls) | p-value | Significance    | probe_ID      | Cell fraction                     |
|--------------|------------------------------------------------------------------------|---------|-----------------|---------------|-----------------------------------|
| Crabp2       | 0.97                                                                   | 0.80    | Not Significant | Mm00801693_g1 | PDGFR $\alpha$ <sup>+</sup> cells |
| Stra6        | 0.96                                                                   | 0.84    | Not Significant | Mm00486457_m1 |                                   |
| Hbegf        | 1.10                                                                   | 0.52    | Not Significant | Mm00558507_m1 |                                   |
| Cyp26b1      | 0.39                                                                   | 0.31    | Not Significant | Mm00439306_m1 |                                   |
| Raldh2       | 1.26                                                                   | 0.45    | Not Significant | Mm00501306_m1 |                                   |
| RAR $\gamma$ | 1.03                                                                   | 0.89    | Not Significant | Mm00441091_m1 |                                   |
| ROR2         | 1.24                                                                   | 0.52    | Not Significant | Mm00443470m1  |                                   |
| Hbegf        | 0.81                                                                   | 0.43    | Not Significant | Mm00558507_m1 | PDGFR $\alpha$ <sup>-</sup> cells |
| Raldh2       | 1.36                                                                   | 0.32    | Not Significant | Mm00501306_m1 |                                   |
| RAR $\gamma$ | 0.89                                                                   | 0.80    | Not Significant | Mm00441091_m1 |                                   |
| Cyp26b1      | 0.60                                                                   | 0.54    | Not Significant | Mm00439306_m1 |                                   |
| Stra6        | 0.91                                                                   | 0.69    | Not Significant | Mm00486457_m1 |                                   |
